# Supplementary material for: Molecular Correlates of Diapause in Aphidoletes aphidimyza
Source: MDPI journal article supplement (doi:10.3390/insects15050299), 2024-04-23
Supplement: s1 [file s1]

Supplement table XIII Primer sequences for qRT-PCR

| Gene ID          | Gene name                                  | Primer sequence                               |
|------------------|--------------------------------------------|-----------------------------------------------|
| c51531.graph_c2  | Tubulin                                    | GGACAATCTGGTGCCGGTAA<br>GCAATCGCATGATTCCGGCTT |
| c58243.graph_c1  | Citrate synthase (CS)                      | GGGTATTTCGCTTCCGTGGAT<br>TCACCGGTAACAAGCAACCA |
| c62192.graph_c1  | Isocitrate dehydrogenase (IDH)             | AGGCGGTACGGTATTTTCGTG<br>ATTGATCAGCGTGGGCATGT |
| c62223.graph_c12 | Oxoglutarate dehydrogenase (OGDH)          | GCCCAGTTTTCGACTGTACCA<br>TTCAGTTCGTGTGCCGGTAA |
| c61907.graph_c1  | Succinate dehydrogenase (SDH)              | TGCGACTGCTTTGTGTGTTG<br>ATGAATGCCAATGTTGCCGC  |
| c61013.graph_c5  | Malate dehydrogenase (MDH)                 | ATTGGTGGTCATTCGGGTGT<br>TGAATGCGTTCGGTCAATGC  |
| c58815.graph_c0  | Phosphoglycerate kinase (PGK)              | ATACACTTTGGCTCCGGTGG<br>AAGCCTCTTCAACTTCGGCA  |
| c59467.graph_c0  | Pyruvate carboxylase (PC)                  | GTGACGTAAGCGATCCGACT<br>CAAAGCACATGAGTTCCGGC  |
| c62150.graph_c0  | Phosphoglucomutase (PGM)                   | AATTGCCGCTTTGCTTGTT<br>AACAGTTTCGAGCTCACCGT   |
| c60574.graph_c0  | Glucose-6-phosphate 1-dehydrogenase (G6PD) | ATGAACGCTGGGATGGTGT<br>AAATATCGCCGGGCACATCA   |
| c60958.graph_c0  | Glucose-6-phosphatase 2 (G6P)              | TCACATGCGAAACAAGTGG<br>CGACGAAACCAAGGCGATTG   |
| c61092.graph_c9  | Glycogen phosphorylase (GP)                | CCATCCCAGAGCTTATGCGT<br>CCTCCGGTAAAACGGTGTGA  |
| c56307.graph_c0  | Alpha-trehalose-phosphate synthase (TPS)   | TGGTGTGCGATTGGTCTGAGC<br>TGTGATGATGTGACGCGGAA |
| c60207.graph_c1  | Trehalase (TREA)                           | AAAAGCTGGCGCTGAAAGTG<br>AACCGGAACAATTGAACGGC  |
| c51671.graph_c0  | Trehalose-phosphate phosphatase (TPP)      | AAAGGTCATGCTGCGCTACT<br>GTCTTCATCGCTCGTGTCGT  |
| c38842.graph_c0  | Glycogen synthase (GYS)                    | TGAACTACGGGACCCAAACG<br>CAGGGATGAGGATCGAAGCC  |
| c41125.graph_c0  | Phosphoenolpyruvate carboxykinase (PEPCK)  | TGGTGTGACACCAGGAACAT<br>CAGTAAACACCACCGTCCGA  |
| c54598.graph_c0  | Hexokinase (HK)                            | ATGGGGCGCATTTGGTGATA<br>CCTCCCGGCAAAAGAGATGT  |
| c61807.graph_c1  | 6-phosphofructokinase                      | CTTGCGGTATGAATGCAGCC<br>TTTGCTTGACATTGCCAGCC  |
| c59857.graph_c0  | Glucose-6-phosphate isomerase              | TGCGATTTTATTGCACCGGC<br>AGCTTCGGTTTTACCAGCCA  |
| c54154.graph_c0  | Phosphoglycerate mutase                    | CACCAAGGATCCCCGGTATG<br>CCAGTATGGCAGTGTACGGG  |
